# Supplementary material
Source: MDPI journal article supplement (https://www.mdpi.com/2071-1050/12/7/2590)
Supplement: s1 [file s1]

## Supplementary Materials I: the empirical literature

Sustainability cannot be separated from individual and social choices related to environmental behaviour. Thus, my analysis will be performed in the context of empirical psychological and anthropological research to seek support for a reliable relationship between religious ethical precepts and environmentally sustainable behaviours. Psychology's contribution relies on its ability to identify both individual motivations that arise from experience and objectives (perhaps supported by incentives) that promote pro-environment behaviour. Psychology also identifies inborn attitudes, such as the common desire to increase consumption. In contrast, anthropology focuses on social values that arise from the interactions between a nation's traditions (including education) and an individual's perceptions. These interactions can also promote environmentally sustainable behaviour despite cultural factors such as the pressure to have a family and thereby increase the population.

In summary, I have assumed that psychology describes universal thought processes that are less strongly affected by cultural prescriptions and proscriptions, and that involve cognition that identifies relationships such as the connection between religious experiences and responses in the form of pro-environmental behaviour. In contrast, anthropology does not assume a distinction between how people think and what they think about. Instead, it identifies regular patterns such as how differences in religious culture can lead differences in a group's behaviours towards their environment.

The empirical literature on psychology has increasingly analysed the relationship between various features of a religion and the resulting pro-environmental behaviours. For example, Zaleha [65] found that veneration of nature in the United States predicted pro-environmental behaviour. Garfield et al. [66] described how a sense of spiritual oneness with God could predict donations to American environmental groups. Clements et al. [67] found Christian pro-environmental attitudes, beliefs, and behaviours in the United States. Gifford and Nilsson [68] reviewed the influences of religions on concerns related to environmental issues and on pro-environmental behaviour, while also reviewing pre-requisites for pro-environmental behaviour such as knowledge, experiences as a child, choices of activities, personality, and perceived control of one's behaviour. Peifer et al. [69] studied the relative impacts of American attendance at religious ceremonies and perceived self-identity and the impacts of belief in an involved God and Biblical literalism on consumption of environmental resources. Arli and Tjiptono [62] compared purchases of green products by Muslim and Christian consumers in Indonesia. Yang and Huang [63] examined the impacts of Chinese religious beliefs on both private and public environmental behaviours.

Other researchers who have studied the relationships between religious ethics and pro-environmental behaviour have examined this problem from an anthropological perspective. The empirical anthropological literature appears to be sceptical about how and whether religion—defined as beliefs, perceptions, and practices related to extraordinary, non-material divine beings or forces—affected perceptions, attitudes, and behaviours related to the environment. For example, Judaism tends to be more concerned than Christianity about the environment, particularly for Judaism's Reformed and Conservative branches. Nonetheless, these attitudes have different impacts that depend on various aspects of religious behaviour (e.g., regular attendance at a synagogue or church, the importance an individual places on religious activities in their daily life) and on environmental attitudes such as support for higher government environmental spending, a willingness to invest personally in activities that protect nature, and the individual's self-reported degree of concern for the environment [70].

Note that the anthropological literature provides some evidence that religions can lead to anti-environmental behaviour. Indeed, anti-environmental behaviour may arise from fatalistic perspectives [71]. For example, an individual who believes in God's sovereignty over nature may believe it is arrogant to think that humans can damage or protect nature. That perspective can lead to inaction or wrong action based on the perception that environmental responses are the consequences of divine favour or disfavour. Individuals with that attitude may be misled to adopt ineffective solutions, such as prayer or waiting passively for the world to end, rather than taking action to solve a problem [72].

Previous authors have emphasized the crucial importance of overpopulation (e.g., [73]) or overconsumption (e.g., [74]). Such authors have been sceptical about the ability of religious institutions to promote greener behaviour by their adherents [75]. They base this scepticism on three observations. First, they note the increasing number of people who claim no affiliation with any religion. Second, they highlight disagreements among religions on many of the points that must be considered to achieve sustainability. For

example, they may condemn greed and destruction of nature, and commend restraint and protection of nature, and they may command adherents to live in harmony with their natural world. They may also promote attitudes that contribute little or nothing to achieving sustainability, such as assuming that any belief that the natural world has value represents idolatry, or believing that prescriptions of justice, compassion, and reciprocity also apply to non-human beings, which represents a rejection of religious distinctions that suggest humans are in any way special. Third, they note that religious institutions change slowly, and may thus be unable to respond to the rapidly progressing environmental crisis.

In other words, these psychological and anthropological papers study the (direct) impacts of religions on observed pro-environmental behaviours. However, religious institutions can (indirectly) affect environmental behaviours by highlighting sacred texts (e.g., Christian leaders' impacts on recycling behaviors; Buddhist monks' effects on recycled garbage) or by introducing new precepts (e.g., *Laudato Si* by Pope Francis) as well as by relying on existence communities (e.g., donations to protect against biodiversity loss) or by creating new communities (e.g., youth movements to promote environmental literacy and activities).

Table S1 summarises the recent psychological and anthropological literature on direct and indirect impacts of religions on observed pro-environmental behaviours.

**Table S1. The recent (2010-2020) empirical literature on factors that support a direct or indirect impact of religious precepts on observed pro-environmental behaviour.**

|          | Psychology suggests a focus on                                                                                                                                                                                                                                                                                                                                                                                                                                                                                                                                                                                                                                                      | Anthropology suggests a focus on                                                                               |
|----------|-------------------------------------------------------------------------------------------------------------------------------------------------------------------------------------------------------------------------------------------------------------------------------------------------------------------------------------------------------------------------------------------------------------------------------------------------------------------------------------------------------------------------------------------------------------------------------------------------------------------------------------------------------------------------------------|----------------------------------------------------------------------------------------------------------------|
| direct   | <p>Yang and Huang (2018): effects of Christianity on private environmental behaviours in China</p> <p>Arlı and Tjiptono (2017): Muslim and Christian intrinsic and extrinsic religious motivations in Indonesia</p> <p>Peifer et al. (2016): attendance at religious ceremonies vs. biblical literalism in US</p> <p>Clements et al. (2014): Christian environmental behavior in US</p> <p>Garfield et al. (2014): spiritual oneness in US</p> <p>Gifford and Nilsson (2014): pre-requisites of environmental behavior (e.g., knowledge, childhood experiences, activity choices, personality, and perceived behavioural control)</p> <p>Zaleha (2013): nature veneration in US</p> | <p>Taylor et al. (2016): synagogue or church attendance and the importance of religion in daily life in US</p> |
| Indirect | <p>Goldman et al. [76]: impacts of religious youth movements on environmental literacy and pro-environmental activities in Israel</p> <p>Lakhan (2018): during religious speeches support recycling behaviours in Christian ethnic minorities in Canada</p> <p>Clements (2018): religiously framed messages to increase donations to protect against biodiversity loss in US</p> <p>Intahphuak et al. (2017): teaching responsibility by Buddhist monks during religious ceremonies affect separation of recycled garbage in Thailand</p> <p>Clements (2016): messages based on religious messages to promote water conservation in US</p>                                          | <p>Sponsel (2016): protect sacred places</p>                                                                   |

In summary, the present study combines quantitative approaches on pro-environmental behaviors within the same mathematical framework at a country level (similar methodologies are used by other papers, singularly) and it provides insights about impacts of religions on pro-environmental behaviors (similar results are achieved by other papers, separately), by taking an anthropological perspective for direct impacts of religious precepts, to achieve insights on reliability, and by referring to indirect impacts of religious precepts within the psychological literature, to discuss the effectiveness of religious precepts as environmental policies.

## Supplementary Materials II: the suggested methodology

Pro-environmental behaviours depend on individual feeling and social identity [45]. As for religions, the main factors determining pro-environmental behaviours are beliefs and communities, where the relative importance of religious communities is different for different religions [61].

Table S2 summarizes some recent empirical papers on the impacts of religious beliefs and/or communities on observed and self-stated pro-environmental behaviour, intention and attitude, by disregarding concern. Note that 2 papers consider both beliefs and community; 6 papers refer to observed pro-environmental behaviours; 1 paper uses longitudinal data.

**Table S2. Some recent (2015-2020) empirical papers on factors that support a *direct* impact of religious precepts on observed and self-stated pro-environmental behaviour, intention and attitude. Papers in Table S1 are included in the first column.**

|                       | Observed behaviour                                                                | Self-stated behaviour                                                                                                              | Intention                                                                                                                                                                                                                                       | Attitude                                                                                                                                            |
|-----------------------|-----------------------------------------------------------------------------------|------------------------------------------------------------------------------------------------------------------------------------|-------------------------------------------------------------------------------------------------------------------------------------------------------------------------------------------------------------------------------------------------|-----------------------------------------------------------------------------------------------------------------------------------------------------|
| Beliefs or Community  | This study: impacts over time of 5 main religious traditions across 180 countries | Boto-Garcia and Bucciol (2020): religious people do not translate environmental concerns into energy saving action in EU countries | Sheng et al. (2019): Chinese cultural values (Doctrine of the Mean) impact on green purchasing in China                                                                                                                                         | Konisky (2018) impacts over time of Jewish and Christian traditions in US                                                                           |
| Beliefs               | Garfield et al. (2014)<br>Zaleha (2013)                                           | Smith et al. (2017) in US                                                                                                          |                                                                                                                                                                                                                                                 | Village (2015) biblical interpretation, dominion and sacramentalism are uncorrelated with willingness to sacrifice to protect the environment in UK |
| Community             | Yang and Huang (2018)<br>Taylor et al. (2016)                                     |                                                                                                                                    | Liao et al. (2018): Confucian culture impacts on food waste in China                                                                                                                                                                            |                                                                                                                                                     |
| Beliefs and Community | Arli and Tjiptono (2017)<br>Peifer et al. (2016)                                  | Gutsche (2019) regional Christian religiosity impacts on ecological activities and purchases in Germany                            | Hwang (2017): community-based (Protestants and Catholics) religious groups show a greater intention to pay taxes and to lower their living standard to protect the environment than individual-based (Buddhist) religious groups in South Korea |                                                                                                                                                     |

In summary, the present study refers to an original panel dataset (to account for dynamics of impacts) at a country level (to account for social interactions and to compare many religions in different contexts by relying on the same control variables) on observed (rather than self-stated) pro-environmental behaviours (to avoid the intention-action and attitude-action gaps) and the religions' majorities (to avoid the identification problems), by combining the most promising methodologies, separately suggested by other papers within the empirical literature. Indeed, papers (e.g., [60, 61]) that used both individual and community variables (i.e., individual religion's affiliation and community religions' percentages), although based on non-observed environmental behaviours, highlighted that impacts of community variables are significant, whereas impacts of individual variables are non-significant. This supports the present study in using an anthropological approach (i.e., social values that arise from the interactions between a nation's traditions and an individual's perceptions) rather than a psychological approach (i.e. individual motivations that arise from experience and objectives). Thus, errors in estimating the direct impacts of religions on pro-environmental behaviours are likely to be larger if self-stated behaviour, intention or attitude are used instead of observed behaviours than if religions' majorities are used instead of individual affiliations, since religions' majorities depict both beliefs and communities. Moreover, the conditions required to apply the representative individual at a country level

(i.e., the national-scale environmental ethics) are satisfied [45]. Finally, linking pro-environmental behaviours to religious precepts is motivated from papers (e.g., [79, 82]) that used individual variables for non-observed behaviours, by suggesting a greater impact of some pro-environmental precepts in some religions than in other religions (e.g., water conservation in Islam; waste recycling in Buddhism; organic food in Hinduism). Evidently, if national or individual panel data on observed specific pro-environmental behaviours (e.g., water conservation, waste recycling, organic food, energy conservation) become available, the methodology suggested in this paper for generic pro-environmental behaviours could be replicated.

I will conclude this section with four methodological remarks. First, I used the names of the religions to refer to some *main* environmental precepts that can be found in (old) sacred (written) texts, for precepts that can be feasibly accepted by many people to achieve local or global sustainability. I chose these precepts because they were broadly representative of a range of religious precepts and of differences among religions rather than comparing the different schools of thought for each religion or using a wider sample of global religions. In future research, the model I developed could be productively applied to such intra-religion comparisons or to a wider range of world religions. This implies that the exclusion of Christianity, supported by the statistical analysis, amounts to the exclusion of “domination over nature” as a sustainable ethic, but it does not exclude the possibility that Christians could adopt the stewardship precept from Judaism or the frugality precept from Buddhism. Second, precepts in addition to “parsimony” might be found in a further detailed analysis of Islamic sacred texts. Third, the exclusion of oral or written recent precepts avoids comparisons between the many recent oral and written texts (e.g., a comparison of the Catholic Pope’s encyclical texts vs. the oral tradition in Voodoo), but this does not exclude the possibility that some current religious institutions can orally teach different sustainability principles, as in the faith-based organisations discussed by Moyer et al. [81]. It also does not exclude the possibility that some current religious institutions can argue in writing for a form of ecology that integrates human and social dimensions, although the reference is to the same *main* sustainability principles discussed in this study (e.g., the Pope’s encyclical “*Laudato Si*”, which is discussed by [83]). Fourth, the main insight obtained from the theoretical framework is that the main religious environmental precepts cover all alternative analytical solutions of the inter-temporal sustainability problem: maximising current welfare subject to an inter-temporal constraint on resource uses in Judaism; a minimisation of current resources to achieve a given welfare level subject to an inter-temporal constraint on resource uses in Islam; and an equilibrium use of resources for each generation in Buddhism and Hinduism. However, the empirical methodology I adopted to compare feasibility, consistency, and replicability of these sustainability solutions required that the specified model be validated by using measured variables. Note that the tight consistency between the model I developed and the variables I used made it impossible to test the suggested model using other variables or a different model with the same variables. Instead, the current study found a consistent compromise between the selected variables and the model specifications. For example, the Cobb-Douglas utility function allows calibration of the model by using the percentages of GDP invested in single issues at a national level. Of course, alternative specifications could be adopted if other variables are chosen.

## References

65. Zaleha, B.D. “Our only heaven”: Nature veneration, quest religion, and pro-environmental behavior. *J. Study Relig. Nat. Cult.* **2013**, 7, 131–153.
66. Garfield, A.M.; Drwecki, B.B.; Moore, C.F.; Kortenkamp, K.V.; Gracz, M.D. The oneness beliefs scale: Connecting spirituality with pro-environmental behavior. *J. Sci. Study Relig.* **2014**, 53, 356–372.
67. Clements, J.M.; McCright, A.M.; Xiao, C. Green Christians? An empirical examination of environmental concern within the US general public. *Organ. Environ.* **2014**, 27, 85–102.
68. Gifford, R.; Nilson, A. Personal and social factors that influence pro-environmental concern and behavior: A review. *Int. J. Psychol.* **2014**, 49, 131–157.
69. Peifer, J.L.; Khalsa, S.; Howard Ecklund, E. Political conservatism, religion, and the environmental consumption in the United States. *Environ. Politics* **2016**, 25, 661–689.
70. Taylor, B. The United Nations (via religion and its affiliated agencies) to the rescue in the cause of conservation? *J. Study Relig. Nat. Cult.* **2016**, 10, 485–499.
71. Taylor, B. Religion to the Rescue (?) in an age of climate disruption. *J. Study Relig. Nat. Cult.* **2015**, 9, 7–18.
72. Sponsel, L.E. Spiritual ecology, sacred places, and biodiversity conservation. In *Routledge Handbook of Environmental Anthropology*; Kopnina, H., Shoreman-Ouimet, E., Eds.; Routledge: New York, NY, USA, 2016; pp. 132–143.

73. Crist, E. Choosing a planet of life. In *A Future Beyond Growth: Towards a Steady State Economy*; Washington, H., Twomey, P., Eds.; Routledge: New York, NY, USA, 2016; pp. 43–55.
74. Twomey, P.; Washington, H. Relating the steady state economy to the green, circular and blue economies. In *A Future Beyond Growth: Towards a Steady State Economy*; Washington, H., Twomey, P., Eds.; Routledge: New York, NY, USA, 2016; pp. 129–145.
75. Taylor, B.; Van Wieren, G.; Zaleha, B. The greening of religion hypothesis (part two): Assessing the data from Lynn White, Jr, to Pope Francis. *J. Study Relig. Nat. Cult.* **2016**, *10*, 306–378.
76. Goldman, D.; Pe'er, S.; Yavetz, B. Sociocultural anchors for incorporating sustainability in youth movements: Comparisons among secular, religious, and ultraorthodox movements. *J. Environ. Educ.* **2019**, 1–17, doi:10.1080/00958964.2019.1646203.
77. Boto-Garcia, D.; Bucciol, A. Climate change: Personal responsibility and energy saving. *Ecol. Econ.* **2020**, *169*, 106530.
78. Sheng, G.; Xie, F.; Gong, S.; Pan, H. The role of cultural values in green purchasing intention: Empirical evidence from Chinese consumers. *Int. J. Consum. Stud.* **2019**, *43*, 315–326.
79. Smith, E.K.; Hempel, L.M.; MacIlroy, K. What's "evangelical" got to do with it? Disentangling the impact of evangelical Protestantism on environmental outcomes. *Environ. Politics* **2017**, *27*, 292–319.
80. Liao, C.; Hong, J.; Zhao, D.; Zhang, S.; Chen, C. Confucian culture as determinants of consumers' food leftover generation: Evidence from Chengdu, China. *Environ. Sci. Pollut. Res.* **2018**, *25*, 14919–14933.
81. Moyer, J.M.; Sinclair, A.J.; Diduck, A.P. Learning for sustainability among faith-based organisations in Kenya. *Environ. Manag.* **2014**, *54*, 360–372.
82. Village, A. Was white right? Biblical interpretation, theological stance and environmental attitudes among a sample of UK churchgoers. *J. Empir. Theol.* **2015**, *28*, 23–48.
83. Zsolnai, L. Frugality and the intrinsic value of nature. *Integral Ecol. Sustain. Bus.* **2017**, *26*, 67–76.

### Supplementary Materials III: the applied datasets

**Table S3. Per capita GDP (purchasing power parity basis, PPP) and population in 2012 were obtained from the World Bank's world development indicators database (<http://data.worldbank.org>). The per capita use of the environment for representative individuals in these countries (the ecological footprint, *EF*) was obtained from the Global Footprint Network (<http://www.footprintnetwork.org>). Religions (HIN/BUD, Hinduism or Buddhism; ISL, Islam; JUD, Judaism) that accounted for more than 50% of a country's population are designated "1"; those that accounted for less than 50% are designated "0". If the agriculture sector accounted for more than 16% of GDP, a country was defined as pre-industrial; if the industry sector accounted for more than 32% of GDP, the country was defined as industrial; and if the service sector accounted for more than 64% of GDP, the country was defined as post-industrial.**

|                      | Pre-industrial | Industrial | Post-industrial | JUD | ISL | HIN/BUD | GDP (PPP) in 2012 | EF in 2012 | Population in 2012 |
|----------------------|----------------|------------|-----------------|-----|-----|---------|-------------------|------------|--------------------|
| Afghanistan          | 1              |            |                 | 0   | 1   | 0       | 1 899             | 0.8        | 29 726 803         |
| Albania              | 1              |            |                 | 0   | 1   | 0       | 9 791             | 2.2        | 2 900 489          |
| Algeria              |                | 1          |                 | 0   | 1   | 0       | 13 196            | 2.1        | 37 439 427         |
| Azerbaijan           |                | 1          |                 | 0   | 1   | 0       | 15 888            | 2.3        | 9 295 784          |
| Bangladesh           | 1              |            |                 | 0   | 1   | 0       | 2 715             | 0.7        | 155 257 387        |
| Bhutan               |                | 1          |                 | 0   | 0   | 1       | 7 120             | 4.8        | 743 711            |
| Bosnia & Herzegovina |                |            | 1               | 0   | 1   | 0       | 9 344             | 3.1        | 3 828 419          |
| Burkina Faso         | 1              |            |                 | 0   | 1   | 0       | 1 520             | 1.2        | 16 590 813         |
| Cambodia             | 1              |            |                 | 0   | 0   | 1       | 2 795             | 1.2        | 14 832 255         |
| Chad                 | 1              |            |                 | 0   | 1   | 0       | 1 961             | 1.5        | 12 715 465         |
| China                |                | 1          |                 | 0   | 0   | 1       | 11 017            | 3.4        | 1 350 695 000      |
| Comoros              |                |            |                 | 0   | 1   | 0       | 1 355             | 1          | 733 661            |
| Egypt                |                | 1          |                 | 0   | 1   | 0       | 10 067            | 2.2        | 85 660 902         |
| Eritrea              |                |            |                 | 0   | 1   | 0       | 566               | 0.4        | 4 892 233          |
| Gambia               | 1              |            |                 | 0   | 1   | 0       | 1 570             | 1          | 1 807 108          |
| Ghana                | 1              |            |                 | 0   | 1   | 0       | 3 659             | 2          | 25 544 565         |
| Guinea               |                | 1          |                 | 0   | 1   | 0       | 1 197             | 1.4        | 11 628 767         |
| Guinea-Bissau        | 1              |            |                 | 0   | 1   | 0       | 1 349             | 1.5        | 1 714 620          |

|                 |   |   |   |   |        |     |               |
|-----------------|---|---|---|---|--------|-----|---------------|
| India           | 1 | 0 | 0 | 1 | 4 861  | 1.2 | 1 263 589 639 |
| Indonesia       | 1 | 0 | 1 | 0 | 9 283  | 1.6 | 248 037 853   |
| Iran            | 1 | 0 | 1 | 0 | 16 549 | 2.8 | 76 156 975    |
| Iraq            |   | 0 | 1 | 0 | 14 624 | 1.9 | 32 780 975    |
| Israel          | 1 | 1 | 0 | 0 | 30 879 | 6.2 | 7 910 500     |
| Japan           | 1 | 0 | 0 | 1 | 34 988 | 5   | 127 561 489   |
| Jordan          | 1 | 0 | 1 | 0 | 11 340 | 2.1 | 6 318 000     |
| Kyrgyz Republic |   | 0 | 1 | 0 | 2 870  | 1.9 | 5 607 200     |
| Lao PDR         | 1 | 0 | 0 | 1 | 4 498  | 1.2 | 6 473 050     |
| Lebanon         | 1 | 0 | 1 | 0 | 16 574 | 3.8 | 4 440 728     |
| Libya           |   | 0 | 1 | 0 | 22 560 | 3.7 | 6 283 403     |
| Macedonia       | 1 | 0 | 1 | 0 | 11 569 | 3.3 | 2 069 270     |
| Malaysia        | 1 | 0 | 1 | 0 | 22 706 | 3.7 | 29 021 940    |
| Mali            | 1 | 0 | 1 | 0 | 1 484  | 1.5 | 16 112 333    |
| Mauritania      | 1 | 0 | 1 | 0 | 3 488  | 2.5 | 3 777 067     |
| Morocco         | 1 | 0 | 1 | 0 | 6 854  | 1.7 | 32 984 190    |
| Niger           |   | 0 | 1 | 0 | 867    | 1.6 | 17 635 782    |
| Nigeria         | 1 | 0 | 1 | 0 | 5 310  | 1.2 | 168 240 403   |
| Oman            | 1 | 0 | 1 | 0 | 41 186 | 7.5 | 3 545 192     |
| Pakistan        | 1 | 0 | 1 | 0 | 4 380  | 0.8 | 177 392 252   |
| Senegal         | 1 | 0 | 1 | 0 | 2 184  | 1.2 | 13 780 108    |
| Sierra Leone    | 1 | 0 | 1 | 0 | 1 550  | 1.2 | 6 043 157     |
| Sri Lanka       | 1 | 0 | 0 | 1 | 9 981  | 1.3 | 20 424 000    |
| Syria           |   | 0 | 1 | 0 | 5 436  | 1.5 | 21 427 155    |
| Tajikistan      | 1 | 0 | 1 | 0 | 2 343  | 0.9 | 7 930 929     |
| Thailand        | 1 | 0 | 0 | 1 | 14 597 | 2.7 | 67 164 130    |
| Tunisia         | 1 | 0 | 1 | 0 | 10 535 | 2.3 | 10 777 500    |
| Turkey          | 1 | 0 | 1 | 0 | 18 032 | 3.3 | 74 099 255    |
| Turkmenistan    |   | 0 | 1 | 0 | 12 460 | 5.5 | 5 172 941     |
| Uzbekistan      | 1 | 0 | 1 | 0 | 4 705  | 2.3 | 29 774 500    |
| Yemen           | 1 | 0 | 1 | 0 | 3 609  | 1   | 24 882 792    |

**Table S4. Per capita GDP (purchasing power parity basis, PPP) and population in 2012 were obtained from the World Bank's world development indicators database (<http://data.worldbank.org>). The per capita use of the environment for representative individuals in these countries (the ecological footprint, *EF*) was obtained from the Global Footprint Network (<http://www.footprintnetwork.org>). Religion: CHR, Christian. Sectors that accounted for more than 50% of GDP are designated "1"; those that accounted for less than 50% are designated "0". If the agriculture sector accounted for more than 16% of GDP, a country was defined as pre-industrial; if the industry sector accounted for more than 32% of GDP, the country was defined as industrial; and if the service sector accounted for more than 64% of GDP, the country was defined as post-industrial.**

|           | Pre-industrial | Industrial | Post-industrial | CHR | GDP (PPP)<br>in 2012 | EF in<br>2012 | Population<br>in 2012 |
|-----------|----------------|------------|-----------------|-----|----------------------|---------------|-----------------------|
| Argentina |                |            | 1               | 1   | 12 034               | 3.1           | 42 095 224            |
| Armenia   | 1              |            |                 | 1   | 7 268                | 2.2           | 2 978 339             |
| Australia |                |            | 1               | 1   | 42 541               | 9.3           | 22 728 254            |
| Austria   |                |            | 1               | 1   | 44 154               | 6.1           | 8 429 991             |
| Belarus   |                | 1          |                 | 1   | 16 907               | 5.1           | 9 464 000             |
| Belgium   |                |            | 1               | 1   | 40 625               | 7.4           | 11 128 246            |
| Benin     | 1              |            |                 | 0   | 1 794                | 1.4           | 10 049 792            |
| Bolivia   |                | 1          |                 | 1   | 5 793                | 3             | 10 238 762            |

|                              |   |   |   |        |      |             |
|------------------------------|---|---|---|--------|------|-------------|
| Botswana                     | 1 |   | 1 | 14 004 | 3.8  | 2 132 822   |
| Brazil                       |   |   | 1 | 14 970 | 3.1  | 202 401 584 |
| Bulgaria                     |   |   | 1 | 15 731 | 3.3  | 7 305 888   |
| Burundi                      | 1 |   | 1 | 717    | 0.8  | 10 124 572  |
| Cameroon                     | 1 |   | 1 | 2 666  | 1.2  | 21 659 488  |
| Canada                       |   |   | 1 | 41 868 | 8.2  | 34 751 476  |
| Central African Republic     | 1 |   | 1 | 913    | 1.2  | 4 619 500   |
| Chile                        |   | 1 | 1 | 21 142 | 4.4  | 17 388 437  |
| Colombia                     |   | 1 | 1 | 11 840 | 1.9  | 46 881 018  |
| Congo                        |   | 1 | 1 | 641    | 1.3  | 70 291 160  |
| Congo Democratic Republic of | 1 |   | 1 | 5 698  | 0.8  | 4 286 188   |
| Costa Rica                   |   |   | 1 | 13 589 | 2.8  | 4 654 148   |
| Côte d'Ivoire                |   |   | 0 | 2 753  | 1.3  | 21 102 641  |
| Croatia                      |   |   | 1 | 20 183 | 3.9  | 4 267 558   |
| Cuba                         |   |   | 1 | 19 462 | 2    | 11 342 631  |
| Cyprus                       |   |   | 1 | 31 710 | 4.2  | 1 129 303   |
| Czech Republic               |   | 1 | 1 | 28 307 | 5.2  | 10 510 785  |
| Denmark                      |   |   | 1 | 42 869 | 5.5  | 5 591 572   |
| Dominican Republic           |   |   | 1 | 11 528 | 1.5  | 10 155 036  |
| Ecuador                      |   | 1 | 1 | 10 322 | 2.2  | 15 419 493  |
| El Salvador                  |   |   | 1 | 7 718  | 2.1  | 6 072 233   |
| Estonia                      |   |   | 1 | 25 287 | 6.9  | 1 322 696   |
| Ethiopia                     | 1 |   | 1 | 1 234  | 1.1  | 92 191 211  |
| Fiji                         |   |   | 1 | 7 550  | 2.9  | 874 158     |
| Finland                      |   |   | 1 | 39 489 | 5.9  | 5 413 971   |
| France                       |   |   | 1 | 37 224 | 5.1  | 65 639 975  |
| Georgia                      |   |   | 1 | 7 869  | 1.6  | 3 825 000   |
| Germany                      |   |   | 1 | 43 035 | 5.3  | 80 425 823  |
| Greece                       |   | 1 | 1 | 24 816 | 4.4  | 11 045 011  |
| Guatemala                    |   |   | 1 | 6 855  | 1.9  | 15 368 759  |
| Guyana                       | 1 |   | 1 | 6 349  | 3.1  | 758 410     |
| Haiti                        |   |   | 1 | 1 585  | 0.6  | 10 288 828  |
| Honduras                     | 1 |   | 1 | 4 548  | 1.7  | 7 736 131   |
| Hungary                      |   |   | 1 | 22 337 | 2.9  | 9 920 362   |
| Ireland                      |   |   | 1 | 45 642 | 5.6  | 4 586 897   |
| Italy                        |   |   | 1 | 34 796 | 4.6  | 59 539 717  |
| Jamaica                      |   |   | 1 | 8 405  | 1.9  | 2 707 805   |
| Kenya                        | 1 |   | 1 | 2 670  | 1.1  | 42 542 978  |
| Korea Republic of            |   | 1 | 0 | 31 901 | 5.7  | 50 004 441  |
| Latvia                       |   |   | 1 | 20 482 | 6.3  | 2 034 319   |
| Lesotho                      |   | 1 | 1 | 2 384  | 1.7  | 2 057 331   |
| Liberia                      | 1 |   | 1 | 770    | 1.2  | 4 190 155   |
| Lithuania                    |   |   | 1 | 23 722 | 5.8  | 2 987 773   |
| Luxembourg                   |   |   | 1 | 88 159 | 15.8 | 530 946     |
| Madagascar                   | 1 |   | 0 | 1 374  | 1    | 22 293 720  |
| Malawi                       | 1 |   | 1 | 750    | 0.8  | 15 700 436  |
| Mauritius                    |   |   | 1 | 16 651 | 3.5  | 1 255 882   |
| Mexico                       |   | 1 | 1 | 16 136 | 2.9  | 122 070 963 |

|                          |   |   |   |        |     |             |
|--------------------------|---|---|---|--------|-----|-------------|
| Moldova                  |   | 1 | 1 | 4 151  | 1.8 | 3 559 519   |
| Mongolia                 | 1 |   | 0 | 9 809  | 6.1 | 2 808 339   |
| Montenegro               |   | 1 | 1 | 13 817 | 3.8 | 620 601     |
| Mozambique               | 1 |   | 1 | 992    | 0.9 | 25 732 928  |
| Nepal                    | 1 |   | 0 | 2 115  | 1   | 27 500 515  |
| Netherlands              |   | 1 | 0 | 45 728 | 5.3 | 16 754 962  |
| New Zealand              |   | 1 | 0 | 32 806 | 5.6 | 4 408 100   |
| Nicaragua                | 1 |   | 1 | 4 388  | 1.4 | 5 877 034   |
| Norway                   |   | 1 | 1 | 63 620 | 5   | 5 018 573   |
| Panama                   |   | 1 | 1 | 17 903 | 2.8 | 3 743 761   |
| Papua New Guinea         |   |   | 1 | 2 480  | 1.9 | 7 154 870   |
| Paraguay                 | 1 |   | 1 | 7 312  | 4.2 | 6 379 162   |
| Peru                     |   | 1 | 1 | 10 851 | 2.3 | 30 158 768  |
| Philippines              |   | 1 | 1 | 6 042  | 1.1 | 96 017 322  |
| Poland                   |   | 1 | 1 | 22 872 | 4.4 | 38 063 164  |
| Portugal                 |   | 1 | 1 | 25 953 | 3.9 | 10 514 844  |
| Romania                  |   | 1 | 1 | 17 817 | 2.7 | 20 058 035  |
| Russia                   |   | 1 | 1 | 23 299 | 5.7 | 143 201 676 |
| Rwanda                   | 1 |   | 1 | 1 483  | 0.9 | 10 817 350  |
| Serbia                   |   | 1 | 1 | 12 505 | 2.7 | 7 199 077   |
| Singapore                |   | 1 | 0 | 75 630 | 8   | 5 312 437   |
| Slovakia                 |   | 1 | 1 | 25 507 | 4.1 | 5 407 579   |
| Slovenia                 |   | 1 | 1 | 27 680 | 5.8 | 2 057 159   |
| South Africa             |   | 1 | 1 | 12 375 | 3.3 | 52 341 695  |
| Spain                    |   | 1 | 1 | 31 657 | 3.7 | 46 773 055  |
| Sweden                   |   | 1 | 1 | 43 263 | 7.3 | 9 519 374   |
| Switzerland              |   | 1 | 1 | 54 582 | 5.8 | 7 996 861   |
| Tanzania                 | 1 |   | 1 | 2 248  | 1.3 | 48 645 709  |
| Timor-Leste              | 1 |   | 0 | 2 038  | 0.5 | 1 148 958   |
| Togo                     | 1 |   | 0 | 1 294  | 1.1 | 6 745 581   |
| Trinidad & Tobago        |   | 1 | 1 | 30 019 | 7.9 | 1 341 579   |
| Uganda                   | 1 |   | 1 | 1 666  | 1.2 | 35 400 620  |
| Ukraine                  |   | 1 | 1 | 8 319  | 2.8 | 45 593 300  |
| United Kingdom           |   | 1 | 1 | 36 765 | 4.9 | 63 700 300  |
| United States of America |   | 1 | 1 | 50 549 | 8.2 | 314 112 078 |
| Uruguay                  |   | 1 | 1 | 18 439 | 2.9 | 3 396 753   |
| Venezuela                |   | 1 | 1 | 17 702 | 3.6 | 29 854 238  |
| Vietnam                  | 1 |   | 0 | 4 910  | 1.7 | 88 809 200  |
| Zambia                   | 1 |   | 1 | 3 501  | 1.1 | 14 786 581  |
| Zimbabwe                 |   | 1 | 1 | 1 649  | 1.4 | 14 565 482  |
